# Supplementary material for: Can Windows 11 Stop Well-Known Ransomware Variants? An Examination of Its Built-in Security Features
Source: MDPI journal article supplement (doi:10.3390/app14083520), 2024-04-22
Supplement: s1 [file s1]

# Can Windows 11 Stop Well-Known Ransomware Variants? An Examination of Its Built-in Security Features

## Supplementary Materials

Yousef Mahmoud Al-Awadi <sup>1</sup>, Ali Baydoun <sup>1,\*</sup> and Hafeez Ur Rehman <sup>1,2</sup>

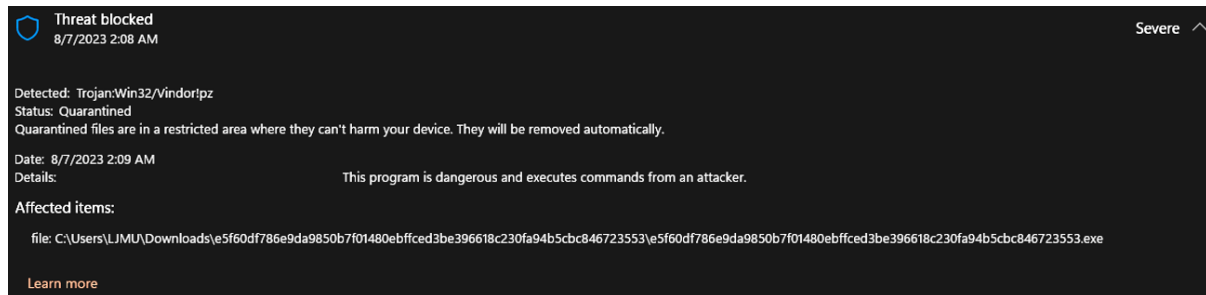

**Figure S1. Evident of detecting the MortalKombat ransomware by Windows Defender.**

Microsoft Defender Antivirus has taken action to protect this machine from malware or other potentially unwanted software. For more information please see the following:  
<https://go.microsoft.com/fwlink/?linkid=37020&name=Trojan:Win32/Vindor!pz&threatid=2147847321&enterprise=0>  
Name: Trojan:Win32/Vindor!pz  
ID: 2147847321  
Severity: Severe  
Category: Trojan  
Path: file: C:\Users\LJMU\Downloads\e5f60df786e9da9850b7f01480ebffcd3be396618c230fa94b5cbc846723553.exe  
Detection Origin: Local machine  
Detection Type: Concrete  
Detection Source: System  
User: NT AUTHORITY\SYSTEM  
Process Name: Unknown  
Action: Quarantine  
Action Status: No additional actions required  
Error Code: 0x00000000  
Error description: The operation completed successfully.  
Security intelligence Version: AV: 1.395.125.0, AS: 1.395.125.0, NIS: 1.395.125.0  
Engine Version: AM: 1.1.23070.1005, NIS: 1.1.23070.1005

**Figure S2. Windows Defender logs after detection the MortalKombat variant.**

Microsoft Defender Antivirus has detected malware or other potentially unwanted software.  
Name: Trojan:Win32/Vindor!pz  
Path file: C:\Users\LJMU\Downloads\70d6105900816937f3c74dce0c044f03ac72df99485cc9f76bf4e0a47bc3e0da.exe

**Figure S3. Windows Defender logs showing the detection of the MortalKombat ransomware download.**

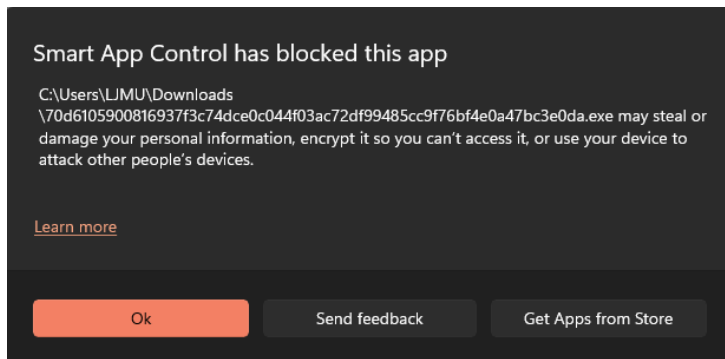

**Figure S4. Smart App Control popup when attempting to run the MortalKombat executable.**

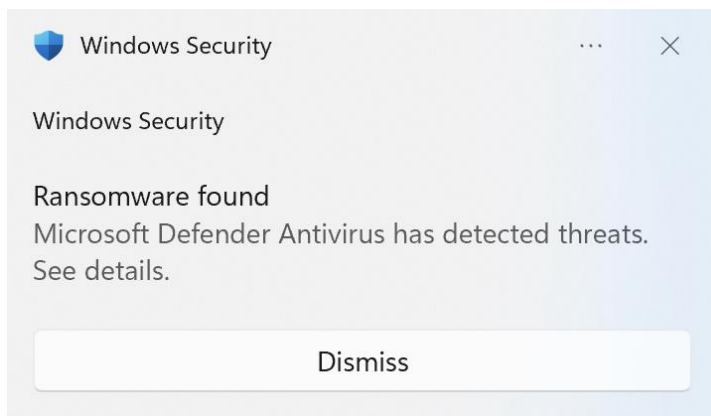

**Figure S5. Windows Defender detecting Cerber upon extraction.**

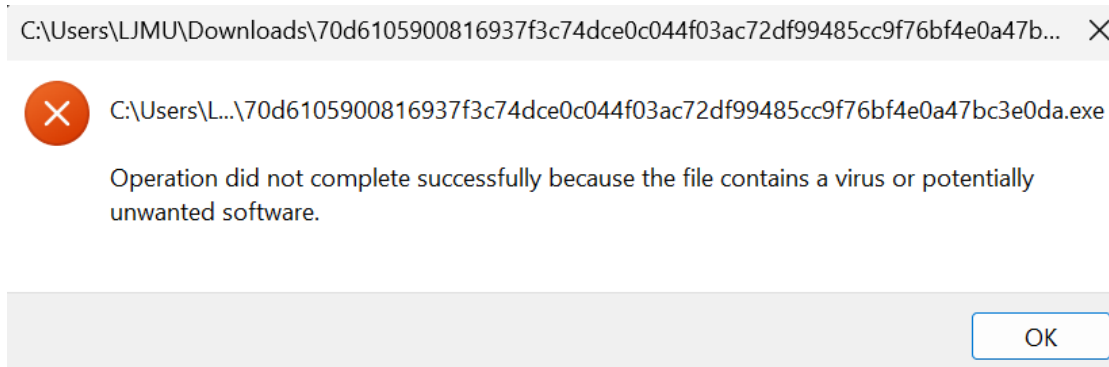

**Figure S6. Windows Defender prevented the user from manually executing the Cerber exe.**

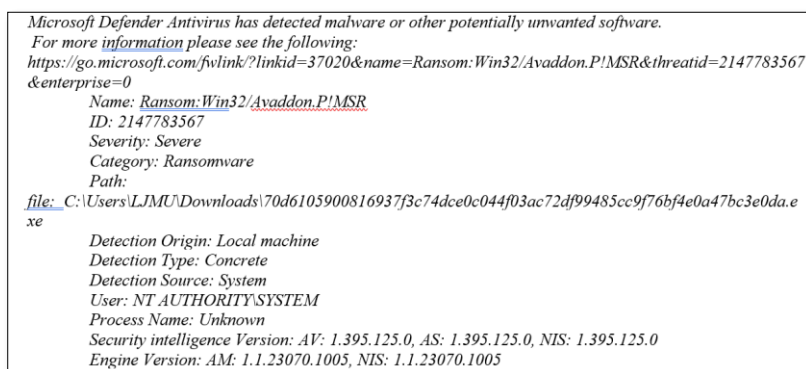

**Figure S7. Windows Defender logs showing the detection of the Cerber ransomware.**

Microsoft Defender Antivirus has detected malware or other potentially unwanted software.  
Name: *Ransom:Win32/Ayaddon.P!MSR*  
Path: *file: C:\Users\LJMU\Downloads\70d6105900816937f3c74dce0c044f03ac72df99485cc9f76bf4e0a47bc3e0da.exe*

**Figure S8. The Windows Defender logs entries in the hardened environment indicating the detection of Cerber ransomware.**

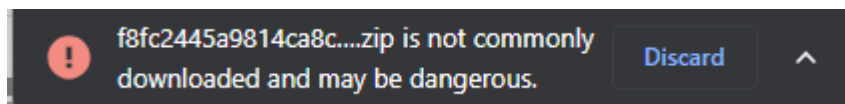

**Figure S9. Chrome giving the user the option to allow executables.**

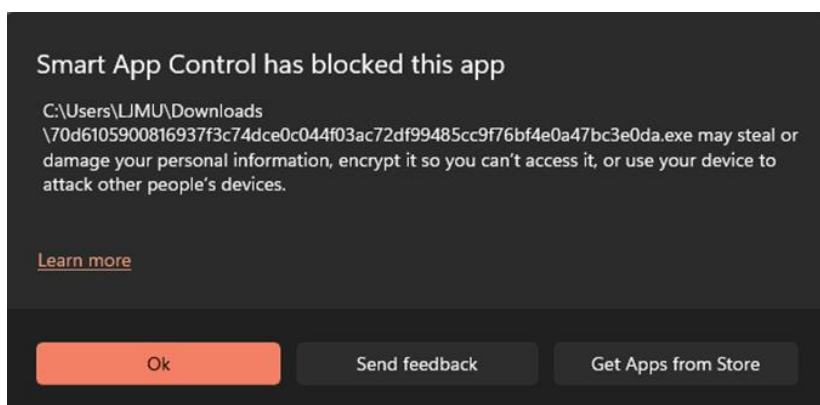

**Figure S10. Smart App Control popup when attempting to run the Cerber executable.**

Microsoft Defender Antivirus has detected malware or other potentially unwanted software.  
For more information please see the following:  
<https://go.microsoft.com/fwlink/?linkid=37020&name=Trojan:Script/Sabsik.TE.A!ml&threatid=2147780197&enterprise=0>  
Name: Trojan:Script/Sabsik.TE.A!ml  
ID: 2147780197  
Severity: Severe  
Category: Trojan  
Path:  
file: C:\Users\LJMU\Downloads\f8fc2445a9814ca8cf48a979bff7f182d6538f4d1ff438cf259268e8b4b76f86.zip;  
webfile: C:\Users\LJMU\Downloads\f8fc2445a9814ca8cf48a979bff7f182d6538f4d1ff438cf259268e8b4b76f86.zip|https://bazaar.abuse.ch/download/f2c07b4b5860ca15a2e8/pid:7360,ProcessStart:133361698951018348  
Detection Origin: Internet  
Detection Type: FastPath  
Detection Source: Downloads and attachments  
User: DESKTOP-35BSJ0S\LJMU  
Process Name: Unknown  
Security intelligence Version: AV: 1.395.125.0, AS: 1.395.125.0, NIS: 1.395.125.0  
Engine Version: AM: 1.1.23070.1005, NIS: 1.1.23070.1005

---

Microsoft Defender Antivirus has taken action to protect this machine from malware or other potentially unwanted software.  
For more information please see the following:  
<https://go.microsoft.com/fwlink/?linkid=37020&name=Trojan:Script/Sabsik.TE.A!ml&threatid=2147780197&enterprise=0>  
Name: Trojan:Script/Sabsik.TE.A!ml  
ID: 2147780197  
Severity: Severe  
Category: Trojan  
Path:  
file: C:\Users\LJMU\Downloads\f8fc2445a9814ca8cf48a979bff7f182d6538f4d1ff438cf259268e8b4b76f86.zip;  
webfile: C:\Users\LJMU\Downloads\f8fc2445a9814ca8cf48a979bff7f182d6538f4d1ff438cf259268e8b4b76f86.zip|https://bazaar.abuse.ch/download/f2c07b4b5860ca15a2e8/pid:7360,ProcessStart:133361698951018348

**Figure S11. Windows Defender Logs showing the detection of Hive Ransomware in the Default testing environment.**

Microsoft Defender Antivirus has taken action to protect this machine from malware or other potentially unwanted software.  
For more information please see the following:  
<https://go.microsoft.com/fwlink/?linkid=37020&name=Trojan:Script/Sabsik.TE.A!ml&threatid=2147780197&enterprise=0>  
Name: Trojan:Script/Sabsik.TE.A!ml  
ID: 2147780197  
Severity: Severe  
Category: Trojan  
Path:  
file: C:\Users\LJMU\Downloads\f8fc2445a9814ca8cf48a979bff7f182d6538f4d1ff438cf259268e8b4b76f86.zip;  
webfile: C:\Users\LJMU\Downloads\f8fc2445a9814ca8cf48a979bff7f182d6538f4d1ff438cf259268e8b4b76f86.zip|https://bazaara.abuse.ch/download/f2c07b4b5860ca15a2e8/?pid:7360,ProcessStart:133361698951018348  
Detection Origin: Internet  
Detection Type: FastPath  
Detection Source: Downloads and attachments  
User: NT AUTHORITY\SYSTEM  
Process Name: Unknown  
Action: Quarantine  
Action Status: No additional actions required  
Error Code: 0x00000000  
Error description: The operation completed successfully.  
Security intelligence Version: AV: 1.395.125.0, AS: 1.395.125.0, NIS: 1.395.125.0  
Engine Version: AM: 1.1.23070.1005, NIS: 1.1.23070.1005

**Figure S12. Windows Defender Logs showing action taken to protect local machine from Hive Ransomware.**

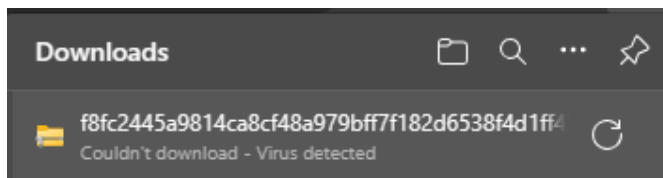

**Figure S13. Hive Ransomware being detected in transit in Microsoft Edge browser.**
